# Supplementary material for: A method for genotyping elite breeding stocks of leaf chicory (Cichorium intybus L.) by assaying mapped microsatellite marker loci
Source: PubMed Central journal article supplement (PMC4696096; doi:10.1186/s13104-015-1819-z), 2015-12-30
Supplement: 13104_2015_1819_MOESM1_ESM.pdf [file 13104_2015_1819_MOESM1_ESM.pdf]

## **Additional File 1. List of primer pairs used to amplify the SSR containing regions**

List of primer pairs used to amplify the SSR containing regions, along with information on the individual SSR motifs and LG to which each SRR marker locus belongs. The M13 tailed primers are indicated in bold. The dotted lines separate the multilocus PCRs; the plain lines indicate Genescan<sup>®</sup> runs.

| Old ID <sup>1</sup> | New ID <sup>2</sup> | LG | Motif                                                                              |     | Primer sequence                                  | T <sub>m</sub><br>(°C) | GC<br>(%) | PCR cycle    | Dye   |
|---------------------|---------------------|----|------------------------------------------------------------------------------------|-----|--------------------------------------------------|------------------------|-----------|--------------|-------|
| <b>EU03D01</b>      | M7.19               | 7  | (CT) <sub>18</sub>                                                                 | For | ATGTCGGAGCAAATCGTTC                              | 59.38                  | 45        | Rad-multi 56 | 6-FAM |
|                     |                     |    |                                                                                    | Rev | <b>TTGTA AACGACGGCCAGT</b> CATGTTCCCGCTCATGAATA  | 58.21                  | 45        |              |       |
| <b>EU10H05</b>      | M7.20               | 7  | (CT) <sub>31</sub>                                                                 | For | <b>TTGTA AACGACGGCCAGT</b> GTCATGATGGCGTAAAAG    | 53.95                  | 44        | Rad-multi 56 |       |
|                     |                     |    |                                                                                    | Rev | ACACTCACTCACACTCCGTAA                            | 61.25                  | 47        |              |       |
| <b>EU02C09</b>      | M4.12               | 4  | (CT) <sub>8</sub> TT(CT) <sub>5</sub> CC<br>(CT) <sub>3</sub> TT(CT) <sub>7</sub>  | For | GGCATCGGGATAGAAAAACA                             | 58.43                  | 45        | Rad-multi 56 | VIC   |
|                     |                     |    |                                                                                    | Rev | <b>TTGTA AACGACGGCCAGT</b> TCAATGCCTCAACAGAAATCC | 59.04                  | 42        |              |       |
| <b>EU07G10</b>      | M4.10b              | 4  | (CT) <sub>21</sub> CATA<br>(CA) <sub>5</sub> CT(CA) <sub>5</sub>                   | For | CATCCATTATTGGGCAG                                | 52.33                  | 47        | Rad-multi 54 | PET   |
|                     |                     |    |                                                                                    | Rev | <b>TGTA AACGACGGCCAGT</b> CACCAACGAACTCCTTACAAA  | 58.92                  | 42        |              |       |
| <b>EU0022</b>       | M1.1                | 1  | (GA) <sub>40</sub>                                                                 | For | <b>TTGTA AACGACGGCCAGT</b> CCAACGGATACCAAGGTGTT  | 60.45                  | 50        | Rad-multi 54 | NED   |
| <b>A124</b>         | M9.25               | 9  | (CA) <sub>11</sub>                                                                 | Rev | AACCGCACGGGTTCTATG                               | 60.18                  | 55        |              |       |
|                     |                     |    |                                                                                    | For | GTGTGGGTGTTTGAAGAGC                              | 59.43                  | 52        |              |       |
|                     |                     |    |                                                                                    | Rev | <b>TTGTA AACGACGGCCAGT</b> TCAAGAACATCAACGCGTAA  | 58.31                  | 40        |              |       |
| <b>EU03H01</b>      | M4.11b              | 4  | (TG) <sub>5</sub> CG(TG) <sub>7</sub>                                              | For | GCCATTCCTTTCAAGAGCAG                             | 59.66                  | 50        | Rad-multi 56 | 6-FAM |
|                     |                     |    |                                                                                    | Rev | <b>TTGTA AACGACGGCCAGT</b> AACCCAAAACCGCAACAATA  | 59.07                  | 40        |              |       |
| <b>EU01H08</b>      | M3.7                | 3  | (CT) <sub>22</sub>                                                                 | For | TTCGAGTCTTGCCTTAATTGTT                           | 58.75                  | 36        | Rad-multi 56 |       |
|                     |                     |    |                                                                                    | Rev | <b>TTGTA AACGACGGCCAGT</b> CAGACGACCTTACGGCAACT  | 62.64                  | 55        |              |       |
| <b>A149</b>         | M3.9                | 3  | (CA) <sub>12</sub>                                                                 | For | <b>TTGTA AACGACGGCCAGT</b> CTGCTATGGACAGTTCAGT   | 59.58                  | 50        | Rad-multi 56 | VIC   |
|                     |                     |    |                                                                                    | Rev | CAATTCAGTTGTGATAGACGC                            | 57.81                  | 42        |              |       |
| <b>EU11C09</b>      | M3.8                | 3  | (CT) <sub>16</sub>                                                                 | For | AGGAAGCGGTGTCATCTGT                              | 61.40                  | 52        | Rad-multi 56 |       |
|                     |                     |    |                                                                                    | Rev | <b>TTGTA AACGACGGCCAGT</b> CGCCCACATATTCATTCTCA  | 58.21                  | 45        |              |       |
| <b>sw2H09.2</b>     | M2.5                | 2  | (CT) <sub>5</sub> CC(CT) <sub>13</sub><br>TT(CT) <sub>5</sub>                      | For | GTGCCGGTCTTCAGGTTACA                             | 62.60                  | 55        | Rad-multi 54 | NED   |
|                     |                     |    |                                                                                    | Rev | <b>TTGTA AACGACGGCCAGT</b> CGCCTACCGATTACGATTGA  | 60.16                  | 50        |              |       |
| <b>sw2A12.2</b>     | M9.27               | 9  | (GA) <sub>10</sub> TAAA<br>(GA) <sub>5</sub>                                       | For | <b>TTGTA AACGACGGCCAGT</b> GCTAAAAGAAGTGCAAGGAGA | 58.70                  | 42        | Rad-multi 54 |       |
|                     |                     |    |                                                                                    | Rev | TGTTCTTTCAAGTGCCAA                               | 54.94                  | 38        |              |       |
| <b>B42</b>          | M2.6                | 2  | (CT) <sub>26</sub>                                                                 | For | <b>TTGTA AACGACGGCCAGT</b> GGAGCAGGTAGAGTCCCATC  | 61.61                  | 60        | Rad-multi 54 | PET   |
|                     |                     |    |                                                                                    | Rev | CGTTTGAAAATTTATACCAAAATG                         | 54.54                  | 25        |              |       |
| <b>EU07F12</b>      | M6.16               | 6  | (CT) <sub>12</sub> TT(CT) <sub>15</sub><br>TT(CT) <sub>2</sub> TT(CT) <sub>4</sub> | For | <b>TTGTA AACGACGGCCAGT</b> TATTGCATTGTTGTTCCCTTG | 54.90                  | 35        | Rad-multi 54 |       |
|                     |                     |    |                                                                                    | Rev | TGTATTTAGAAGAGGGAAATAGATG                        | 56.44                  | 32        |              |       |

| Old ID <sup>1</sup> | New ID <sup>2</sup> | LG | Motif                                                    |     | Primer sequence                                     | T <sub>m</sub><br>(°C) | GC<br>(%) | PCR cycle    | Dye   |
|---------------------|---------------------|----|----------------------------------------------------------|-----|-----------------------------------------------------|------------------------|-----------|--------------|-------|
| <b>EU07B09</b>      | M8.22               | 8  | (CA) <sub>5</sub> AA(CA) <sub>9</sub>                    | For | TCGTCATCAGAAACAAAGCAA                               | 58.92                  | 38        | Rad-multi 56 | 6-FAM |
|                     |                     |    |                                                          | Rev | <b>TTGTA AAAACGACGGCCAGT</b> CAAAGAAGGCACTCTTGTCG   | 59.60                  | 50        |              |       |
| <b>A94</b>          | M8.24               | 8  | (TC) <sub>16</sub> (CA) <sub>13</sub>                    | For | <b>TTGTA AAAACGACGGCCAGT</b> GGTCCGTAGACTGCAGACTTT  | 62.27                  | 52        | Rad-multi 56 |       |
|                     |                     |    |                                                          | Rev | CACCGTCCCACCTTTTTAGG                                | 58.52                  | 52        |              |       |
| <b>B214</b>         | M5.14               | 5  | (TC) <sub>11</sub>                                       | For | <b>TTGTA AAAACGACGGCCAGT</b> AAAGTCACACATCGCATTTCCT | 61.32                  | 40        | Rad-multi 56 |       |
|                     |                     |    |                                                          | Rev | GTAGCAGCAGCAGCCATCTT                                | 63.38                  | 55        |              |       |
| <b>sw2F09</b>       | M9.26               | 9  | (GATA) <sub>3</sub> N <sub>19</sub><br>(GA) <sub>9</sub> | For | <b>TTGTA AAAACGACGGCCAGT</b> CCTACACTCGGCCACCTACT   | 63.36                  | 60        | Rad-multi 56 | VIC   |
|                     |                     |    |                                                          | Rev | TCGACGGTATAACAACACCTG                               | 60.28                  | 47        |              |       |
| <b>EU02E02</b>      | M7.21               | 1  | (CT) <sub>13</sub>                                       | For | GGACACCGAGCTGGAGAA                                  | 61.46                  | 61        | Rad-multi 56 |       |
|                     |                     |    |                                                          | Rev | <b>TTGTA AAAACGACGGCCAGT</b> TTCCACTTTCGGGAGTTACC   | 59.80                  | 50        |              |       |
| <b>EU06C09</b>      | M1.3                | 1  | (CT) <sub>17</sub>                                       | For | <b>TTGTA AAAACGACGGCCAGT</b> TGGAGAAAAATGAAGCAC     | 53.16                  | 38        | Rad-multi 54 | PET   |
|                     |                     |    |                                                          | Rev | GAATGAGTGAGAGAATGATAGGG                             | 58.36                  | 43        |              |       |
| <b>B131</b>         | M2.4                | 2  | (GA) <sub>25</sub>                                       | For | <b>TTGTA AAAACGACGGCCAGT</b> GCTCGAAAAATCGGCTACAAC  | 60.09                  | 57        | Rad-multi 54 |       |
|                     |                     |    |                                                          | Rev | CGAGCCATGTTAGGGTTTGT                                | 60.81                  | 50        |              |       |
| <b>EU08C07</b>      | M6.18               | 6  | (CT) <sub>16</sub>                                       | For | CTCAACGAATGCTTTGGACA                                | 59.23                  | 45        | Rad-multi 56 | 6-FAM |
|                     |                     |    |                                                          | Rev | <b>TTGTA AAAACGACGGCCAGT</b> CCTCGCGGTAGCTTATTGTT   | 60.66                  | 50        |              |       |
| <b>EU02A11</b>      | M5.13               | 5  | (CT) <sub>23</sub>                                       | For | AGGCATAAAGAGGTGTGG                                  | 56.61                  | 50        | Rad-multi 56 |       |
|                     |                     |    |                                                          | Rev | <b>TTGTA AAAACGACGGCCAGT</b> TCAAACATGAAAACCGCTC    | 56.89                  | 42        |              |       |
| <b>EU07C10</b>      | M8.23               | 8  | (CA) <sub>11</sub> (CT) <sub>9</sub>                     | For | TGTAGACACACAAAATGCACA                               | 58.84                  | 38        | Rad-multi 54 | VIC   |
|                     |                     |    |                                                          | Rev | <b>TTGTA AAAACGACGGCCAGT</b> ACCGGTTGAAAACATGAAAT   | 56.59                  | 35        |              |       |
| <b>A158</b>         | M6.17               | 6  | (CA) <sub>8</sub> (CT) <sub>18</sub>                     | For | <b>TGTA AAAACGACGGCCAGT</b> CGTGTCCAAACGCAAACATTAT  | 60.85                  | 40        | Rad-multi 54 |       |
|                     |                     |    |                                                          | Rev | GCACAATTTTCTACCACTTATCC                             | 60.42                  | 41        |              |       |
| <b>EU0030</b>       | M5.15               | 5  | (CT) <sub>11</sub> N <sub>7</sub> (CAA) <sub>5</sub>     | For | <b>TTGTA AAAACGACGGCCAGT</b> AGCACGACTCTGCTGTCTTTT  | 62.75                  | 47        | Rad-multi 54 | NED   |
|                     |                     |    |                                                          | Rev | CGAGCCATGTTAGGGTTTGT                                | 60.81                  | 50        |              |       |
| <b>EU02D02</b>      | M1.2                | 7  | (CT) <sub>19</sub>                                       | For | <b>TTGTA AAAACGACGGCCAGT</b> CCGGCAGAAATTTTATAGG    | 56.14                  | 50        | Rad-multi 54 |       |
|                     |                     |    |                                                          | Rev | CAGGTCATAGGTCCATGTGAAA                              | 60.27                  | 45        |              |       |

1. Cadalen *et. al.* [10]

2. Ghedina *et. al.* [present paper]
