# Supplementary material for: A method for genotyping elite breeding stocks of leaf chicory (Cichorium intybus L.) by assaying mapped microsatellite marker loci
Source: PubMed Central journal article supplement (PMC4696096; doi:10.1186/s13104-015-1819-z), 2015-12-30

Additional File 2. Output of the  $\Delta K$  method [11] showing the two investigated levels of K (*i.e.* K=3 and K=24)

### $\Delta K$ Radicchio - 27 loci SSR

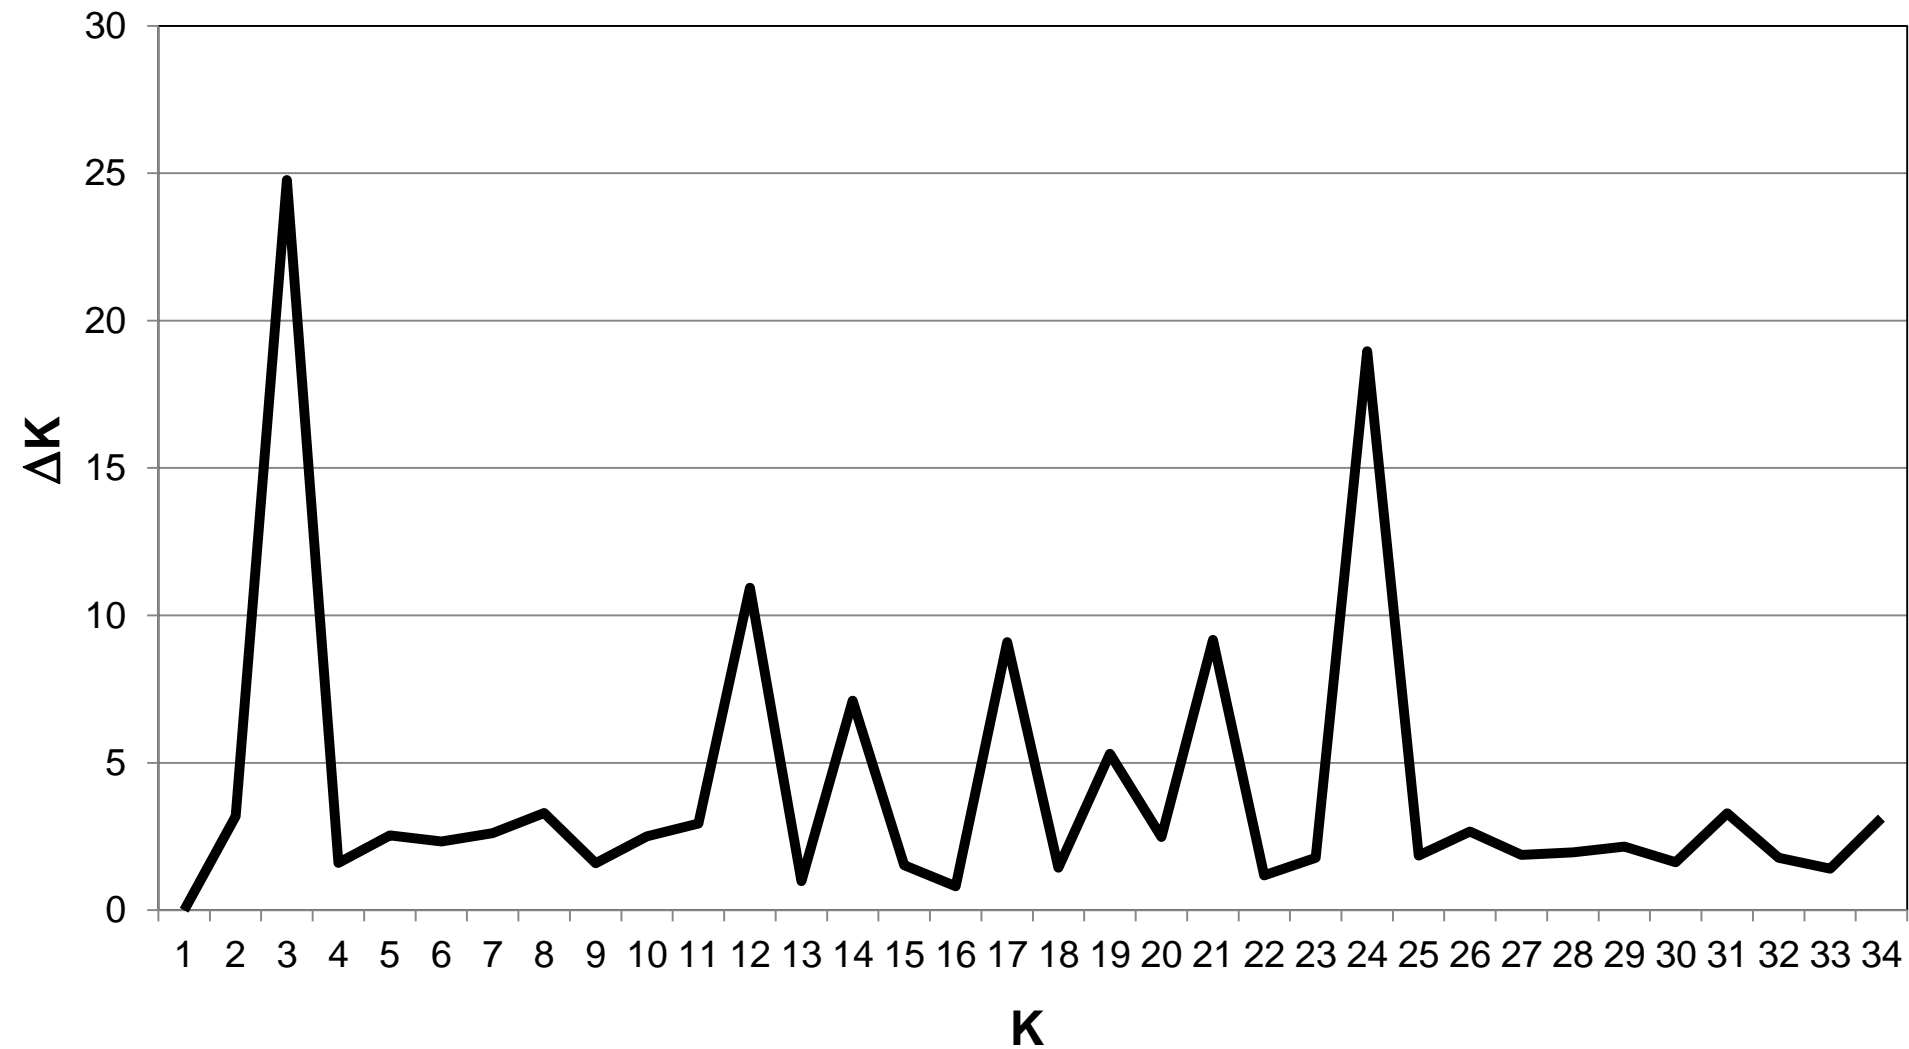

Supplement: 13104_2015_1819_MOESM2_ESM.pdf [file 13104_2015_1819_MOESM2_ESM.pdf]
